# Supplementary material
Source: ML conference proceedings conference paper supplement (https://openaccess.thecvf.com/content/CVPR2022/html/Reddy_WALT_Watch_and_CVPR_2022_paper.html)
Supplement: Supplementary file 2 [file Reddy_WALT_Watch_and_CVPR_2022_supplemental.zip]

Archive with 1 entries (1 files):
- walt_cvpr2022_supp.pdf
